# Supplementary material
Source: PubMed Central journal article supplement (PMC4787639)
Supplement: prop691477.ww1_default.pdf [file prop691477.ww1_default.pdf]

## **Web appendix**

A listing of all hospitals that participated at some point in the Keystone ICU project during the Agency for Healthcare Research and Quality (AHRQ) funded period of September 2003 to September 2005. Some hospitals may not be included in the research results reported in this particular paper.

Aleda E. Lutz VA Medical Center, Saginaw, MI

Allegiance Health (previously Foote Health System)

Battle Creek Health System

Bay Regional Medical Center

Beaumont Hospital-Royal Oak

Beaumont Hospital-Troy

Borgess Medical Center

Botsford General Hospital

Bronson Methodist Hospital

Central Michigan Community Hospital

Chelsea Community Hospital

Community Health Center of Branch County

Covenant Healthcare

Crittenton Hospital Medical Center

Dickinson County Hospital System

Garden City Hospital

Genesys Regional Medical Center

Gerber Memorial Health Services

Gratiot Community Hospital

Harper University Hospital

Henry Ford Hospital

Henry Ford Bi-County Hospital

Henry Ford Wyandotte Hospital

Holland Community Hospital

Huron Valley-Sinai Hospital

Ingham Regional Medical Center

Lakeland Regional Health Care

Lapeer Regional Hospital

Marquette General Health System

McLaren Regional Medical Center

Memorial Healthcare

Mercy General Health Partners

Mercy Health Partners, Hackley Campus (previously Hackley Hospital)

Mercy Hospital Grayling

Mercy Medical Center, Clinton

Mercy Medical Center, Des Moines (IA)

Mercy Medical Center, Sioux City (IA)

Mercy Memorial Hospital

Metro Health Hospital

MidMichigan Medical Center-Midland

Mount Clemens General Hospital

Munson Medical Center

Northern Michigan Regional Health System

North Oakland Medical Centers

Oakwood Annapolis Hospital

Oakwood Heritage Hospital

Oakwood Hospital & Medical Center–Dearborn

Oakwood Southshore Medical Center

Pontiac Osteopathic Hospital

Port Huron Hospital

Providence Hospital

St. Agnes Hospital

St. John Detroit Riverview Hospital

St. John Health-River District Hospital

St. Joseph Health System–Tawas City

St. John Hospital & Medical Center, Detroit

St. John Macomb Hospital

St. John Oakland Hospital

St. Joseph Mercy Hospital Ann Arbor

St. Joseph Mercy Hospital Livingston

St. Joseph Mercy Oakland (AICU)

St. Joseph Regional Medical Center, South Bend (IN)

St. Joseph's Medical Center

Saint Mary's Health Care

St. Mary Mercy Hospital

St. Mary's of Michigan

Sinai-Grace Hospital

Sparrow Health System

Spectrum Health

Spectrum Health United Memorial

Sturgis Hospital

University of Michigan Hospitals and Health Centers

Three Rivers Area Hospital

War Memorial Hospital

West Branch Regional Medical Center

West Shore Medical Center
